# Supplementary material for: Disruption of OsPHD1, Encoding a UDP-Glucose Epimerase, Causes JA Accumulation and Enhanced Bacterial Blight Resistance in Rice
Source: MDPI journal article supplement (doi:10.3390/ijms23020751), 2022-01-11
Supplement: s1 [file s1]

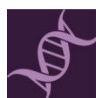

Article

# Disruption of *OsPHD1*, Encoding a UDP-Glucose Epimerase, Causes JA Accumulation and Enhanced Bacterial Blight Resistance in Rice

Yu Gao <sup>1,†</sup>, Xiaojiao Xiang <sup>1,†</sup>, Yingxin Zhang <sup>1</sup>, Yongrun Cao <sup>1</sup>, Beifang Wang <sup>1</sup>, Yue Zhang <sup>1</sup>, Chen Wang <sup>1</sup>, Min Jiang <sup>1</sup>, Wenjing Duan <sup>1</sup>, Daibo Chen <sup>1</sup>, Xiaodeng Zhan <sup>1</sup>, Shihua Cheng <sup>1</sup>, Qunen Liu <sup>1,\*</sup> and Liyong Cao <sup>1,2,\*</sup>

<sup>1</sup> State Key Laboratory of Rice Biology and Chinese National Center for Rice Improvement, China National Rice Research Institute, Hangzhou 311401, China; 15057067488@163.com (Y.G.); xiangxiao1990@163.com (X.X.); zhangyingxin@caas.cn (Y.Z.); caoyongrun93@163.com (Y.C.); nxywb@163.com (B.W.); zhangyuerice@163.com (Y.Z.); 98481037wc@gmail.com (C.W.); jiang\_min@webmail.hzau.edu.cn (M.J.); 13140230176@163.com (W.D.); cdb840925@163.com (D.C.); zhanxiaodeng@caas.cn (X.Z.); chengshihua@caas.cn (S.C.)

<sup>2</sup> Northern Center of China National Rice Research Institute, China National Rice Research Institute, Shuangyashan 155100, China

\* Correspondence: liuqunen@caas.cn (Q.L.); caoliyong@caas.cn (L.C.); Tel.: +86-0571-6337-0218 (Q.L.); Tel.: +86-0571-6337-0329 (L.C.)

† These authors contributed equally for this work.

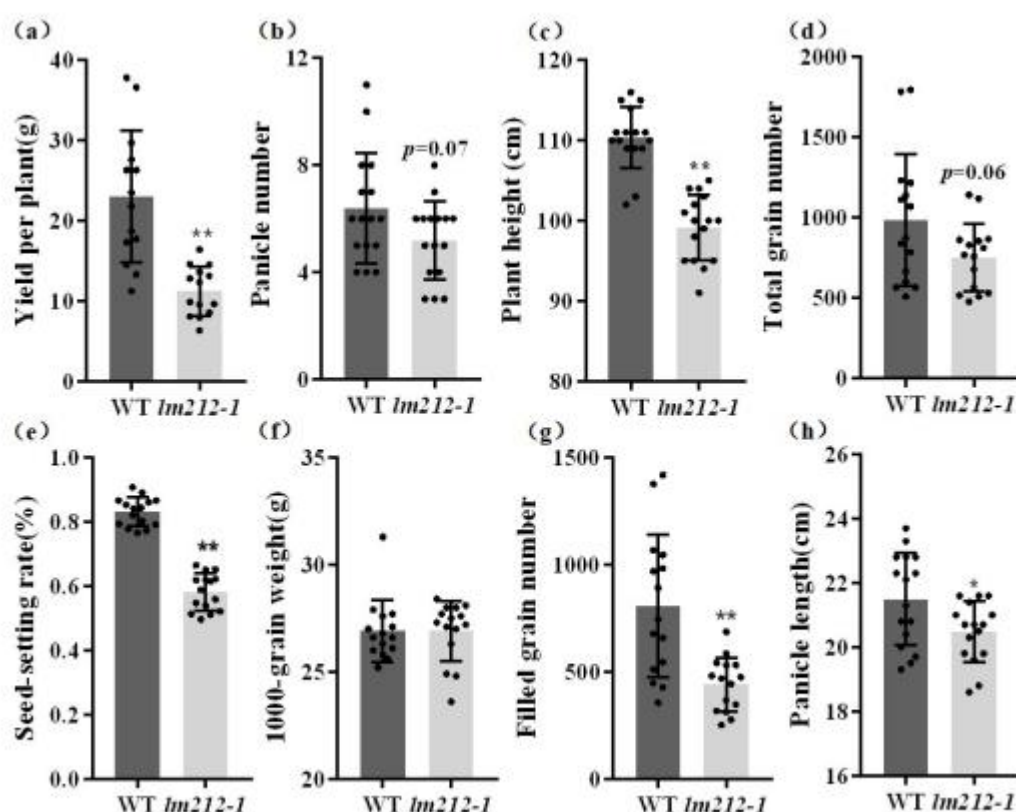

**Figure S1.** Several agronomic traits of WT and *lm212-1* mutant. \*\* $p < 0.01$  by student's  $t$ -test. Data are means $\pm$ SD of sixteen biological replicates.

**Table S1.** List of primers and their uses.

| Primer name | Sequence(5'-3')                                | purpose         |
|-------------|------------------------------------------------|-----------------|
| LD1-F       | TATCGACAAGTCATCTGGTG                           | mapping         |
| LD1-R       | GTTTCCTTGCATTACAGGTG                           |                 |
| LD9-F       | CATTGTATATGCCCTTGTGC                           |                 |
| LD9-R       | GCCAACAGGCAGTAATGTAT                           |                 |
| LD12-F      | AAGGCGCTAAAAGAAACCTA                           |                 |
| LD12-R      | GTGCAGGAAACGATTGAGAT                           |                 |
| LD13-F      | CCTGCAGCATATATAGAGTA                           |                 |
| LD13-R      | TGGTTTCCTTTCATATTCCG                           |                 |
| COM-F       | TCTAGAGTCGACCTGCAGCAGGACAGTCCAGC<br>AACGAG     | complementation |
| COM-R       | AAGCTTGCATGCCTGCAGGAGTGACGGCGTC<br>TTGCTT      |                 |
| OE-F        | ATCCTCTAGAGTCGACATGGGCGGCGCCGCCG<br>TC         | overexpression  |
| OE-R        | ATGCCTGCAGGTCGACTCAACTGTCAAGACCA<br>AGGAATTCTG |                 |
| GUS-F       | GCAGGCATGCAAGCTTAACCTACTACTCCACC<br>TGCCA      | GUS             |
| GUS-R       | CTCAGATCTACCATGGCGCGCGGGCGGGCGGTG<br>GT        |                 |
| GFP-F       | CGGGCTGCAGGAATTCATGGGCGGCGCCGCCG<br>TCTC       | GFP             |
| GFP-R       | GCTTGATATCGAATTCAGTGTCAAGACCAAGG<br>AATTCTGTGA |                 |
| OsUBQ10-F   | TGGTCAGTAATCAGCCAGTTTGG                        | qPCR            |
| OsUBQ10-R   | GCACCACAAATACTTGACGAACAG                       |                 |
| OsPR10-F    | CAGTGGTCAGTAGAGTGATCAG                         |                 |
| OsPR10-R    | GGGTAAAGCTTCATGGTGTAGA                         |                 |
| OsPAL1-F    | GACCCTGTATTTTCTTCGTTCCG                        |                 |
| OsPAL1-R    | AGTAGCAATACTTTCACCCCAA                         |                 |
| OsWRKY45-F  | CGTCGACCAGATTCTCCACACCT                        |                 |
| OsWRKY45-R  | CTCGCTCTGCACCTCCGACCC                          |                 |
| OsPO-C1-F   | ATAGCAATGTGTACGTGGAGAT                         |                 |
| OsPO-C1-R   | ATTCCATGCACATACAGATGGA                         |                 |
| OsSGR-F     | AGGGGTGGTACAACAAGCTG                           |                 |
| OsSGR-R     | GCTCCTTGCGGAAGATGTAG                           |                 |
| OsNYC1-F    | CATGCAACACCAACAAAAGG                           |                 |
| OsNYC1-R    | GACCATTCAGGAGAAGCAG                            |                 |
| OsNYC3-F    | TCTATCTAGGTGCCAAAGGC                           |                 |
| OsNYC3-R    | ATTCTGGCACCTGCTGTTTC                           |                 |
| OsNOL-F     | CCACGAAAGGTATAGGATATG                          |                 |
| OsNOL-R     | TCAAGTCAGTCACCGCAGAT                           |                 |
| OsCOI1a-F   | TACCTTCCTATCTATCCCTGGG                         |                 |
| OsCOI1a-R   | TAGTAGCTTATTCGGGCACAAT                         |                 |
| OsCOI1b-F   | TAAGGAGTTGTTGCTTCAGTGA                         |                 |
| OsCOI1b-R   | CATGAGATCGTGACCAGTCTTA                         |                 |
| OsCOI2-F    | TGCTACCAACAATAGTGTCTT                          |                 |

|                |                         |
|----------------|-------------------------|
| OsCOI2-R       | CTTCAAAACTTTCAGCCTTCGA  |
| OsJamyb-F      | GTTGATGATAGCGGAGACTACA  |
| OsJamyb-R      | TCTTCAAATCTTGTGACTCCGA  |
| OsMYC2-F       | GGGTTTTGTTATCTCCTCTCCT  |
| OsMYC2-R       | AGAATAGGAGGAGAGGAAAGGT  |
| OsRERJ1-F      | GGATAGTGTCCAAATGAAGCAG  |
| OsRERJ1-R      | CCAAAACGCATGACTCCATATA  |
| OsHHLH148-F    | CACAGACATCTCATGTGCAAAA  |
| OsHHLH148-R    | CTTGCTCCATCACAAGCTTTTA  |
| OsJAZ13-F      | ACACGTCAGCTTTAATCCCATA  |
| OsJAZ13-R      | AGGAATAATCGTGCCTGTACA   |
| OsJAZ12-F      | ACCCAAAGAGTTCTTTCACTGA  |
| OsJAZ12-R      | TGGAGACAGTTGTACTTGTACA  |
| OsJAZ11-F      | TGAGCCGAAGAACTGAAGATA   |
| OsJAZ11-R      | ACAGACACGTGGAAATCAAATG  |
| OsJAZ10-F      | CGCAAGAGGATTGATTCACCTT  |
| OsJAZ10-R      | TTCCCATCAATTCAATCTCCCT  |
| OsJAZ9-F       | AGAATTGAGAGCTCGATCGATT  |
| OsJAZ9-R       | AATCAACTCAAGGCCGTTAATG  |
| OsJAZ8-F       | ATGAATGCAAATGCTCCATACC  |
| OsJAZ8-R       | GCTTTATTGTCATCTCTTGCC   |
| OsJAZ6-F       | GAGCCAATGAATCAATGCTCAA  |
| OsJAZ6-R       | CATCGGATCATCTCCTAACACA  |
| OsJAZ5-F       | ATTACTGTTGATTGGTCCCCT   |
| OsJAZ5-R       | CGATCGATCAACACTAAACAGG  |
| OsCEBiP-F      | TTCATCAATCAGCGATACCTCA  |
| OsCEBiP-R      | CTGGTTTGTATGATGAGCGATG  |
| OsCERK1-F      | TGAACAACCTGTATGAGAACCA  |
| OsCERK1-R      | ATGTACAATTTCCAGTGTGC    |
| OsRLCK185-F    | ACTGGGTCGAATTAGGTACATG  |
| OsRLCK185-R    | ATTTGCATGATCAATCACGAGG  |
| OsBSK1-F       | ACCTGGCATATACACCTCCA    |
| OsBSK1-R       | TGTCAAGTGCAAGGGTAGGA    |
| OsLysM-RLK10-F | GTTAGCGAATCAAAAGGACTGG  |
| OsLysM-RLK10-R | GATCAATCAGTTCGTCAAGAGC  |
| OsPUB44-F      | ATGCCTTACTGAAACCAAACC   |
| OsPUB44-R      | ATTCATAGCAAACCCCGAGTAG  |
| OsSERK2-F      | GGCTATGGAATCATGCTTCTTG  |
| OsSERK2-R      | CAATCGAGCAACATCACATCAT  |
| OsMGD-F        | TTTTCATACCATCGCCAGAAAC  |
| OsMGD-R        | TAGGACAAAGGCAAATTTACAG  |
| Os09g0423600-F | ACCAGGTATTCGTCACTGATTT  |
| Os09g0423600-R | AGTATGTCATCTTCCACAAGGG  |
| Os11g0158400-F | AGAACGGAGAAGCATAATTCCT  |
| Os11g0158400-R | GGCTCTTCCAAAATAGCAATGT  |
| Os04g0416900-F | GGTTATTCTGGACAAGATGGGA  |
| Os04g0416900-R | GATCTCATTGCCAGTTAAGCAG  |
| Os02g0539100-F | CTGAACCTGGTATCATCATGGGA |
| Os02g0539100-R | ATTGTTGATGTGTTTGACCAGG  |

|                |                        |
|----------------|------------------------|
| Os03g0268300-F | GCATTCTTCAAGGGTGCATATT |
| Os03g0268300-R | CAGCTCCATCTTAAGACCAGAT |
| Os03g0214400-F | ATAAGTTCAGGCGAGTGATAGG |
| Os03g0214400-R | AATCTTGTGGCAATAAATCCGG |
| Os01g26920-F   | GTTCTCGGGGTGTCTGATGATA |
| Os01g26920-R   | CCAACAATCAGCAAATCGTTCT |

**Table S2.** Genetic analysis of the *lm212-1* mutant.

| Cross combination             | F <sub>1</sub> phenotype | Segregation in F <sub>2</sub> |             | $\chi^2$ |
|-------------------------------|--------------------------|-------------------------------|-------------|----------|
|                               |                          | Wild type                     | Mutant type |          |
| <i>lm212-1</i> × ZhongHui8015 | Wild type                | 586                           | 214         | 0.64     |
